# Supplementary material
Source: MDPI journal article supplement (https://www.mdpi.com/2076-3417/10/21/7674)
Supplement: s1 [file s1]

**Table S1.** Number of *Enchytraeus crypticus* juveniles counted after 21 d exposure to polystyrene nanoplastics (NPIs) in LUFA 2.2 soil. Results are expressed as average value (AV)  $\pm$  standard error (SE). \* Significant differences to control ( $p < 0.05$ ).

| Concentration of NPIs<br>(mg/kg) | Number of Juveniles<br>(AV $\pm$ SE) |
|----------------------------------|--------------------------------------|
| 0                                | 312.1 $\pm$ 10.6                     |
| 0.015                            | 304.5 $\pm$ 10.6                     |
| 1.5                              | 325.8 $\pm$ 18.4                     |
| 15                               | 329.3 $\pm$ 22.0                     |
| 150                              | 294.3 $\pm$ 11.0                     |
| 300                              | 295.5 $\pm$ 23.9                     |
| 450                              | 337.0 $\pm$ 16.0                     |
| 600                              | 300.5 $\pm$ 5.5                      |
| 900                              | 262.3 $\pm$ 28.0                     |
| 1200                             | 128.0 $\pm$ 30.2 *                   |
| 1500                             | 142.0 $\pm$ 41.2 *                   |

**Table S2.** Effect Concentrations (ECx), applying the 2-parameters Logistic model, for survival and reproduction of *Enchytraeus crypticus* after 21 d exposure to polystyrene nanoplastics (NPIs) in LUFA 2.2 soil. EC 20, 50, 80: Concentration that causes 20, 50 and 80% of effect, respectively. Results are presented as estimated value  $\pm$  standard error.

| Endpoints    | EC 20 (mg/kg)       | EC 50 (mg/kg)       | EC 80 (mg/kg)        |
|--------------|---------------------|---------------------|----------------------|
| Survival     | 1257.20 $\pm$ 36.82 | 1541.40 $\pm$ 29.03 | 1825.60 $\pm$ 68.39  |
| Reproduction | 926.37 $\pm$ 95.59  | 1321.10 $\pm$ 63.41 | 1715.80 $\pm$ 118.99 |

**Table S3.** Number of *Enchytraeus crypticus* juveniles counted after 21 d exposure to the dispersant – tween 20 and sodium azide (NaN<sub>3</sub>) – in LUFA 2.2 soil. Results are expressed as average value (AV)  $\pm$  standard error (SE).

| Concentration of tween 20 and NaN <sub>3</sub> (mg/kg) | Number of Juveniles<br>(AV $\pm$ SE) |
|--------------------------------------------------------|--------------------------------------|
| 0                                                      | 284.0 $\pm$ 15.0                     |
| 0.0029 $\pm$ 0.00037                                   | 350.5 $\pm$ 72.6                     |
| 0.29 $\pm$ 0.037                                       | 278.2 $\pm$ 22.4                     |
| 2.9 $\pm$ 0.37                                         | 344.4 $\pm$ 13.7                     |
| 29.1 $\pm$ 3.7                                         | 282.8 $\pm$ 7.6                      |
| 58.3 $\pm$ 7.4                                         | 218.8 $\pm$ 18.9                     |
| 87.4 $\pm$ 11.1                                        | 289.3 $\pm$ 19.2                     |
| 116.5 $\pm$ 14.8                                       | 283.3 $\pm$ 18.4                     |
| 174.8 $\pm$ 22.2                                       | 148.0 $\pm$ 23.7 *                   |
| 233 $\pm$ 29.6                                         | 13.0 $\pm$ 4.9 *                     |
| 291.3 $\pm$ 37                                         | 0.0 $\pm$ 0.0 *                      |

\* Significant differences to control ( $p < 0.05$ ).

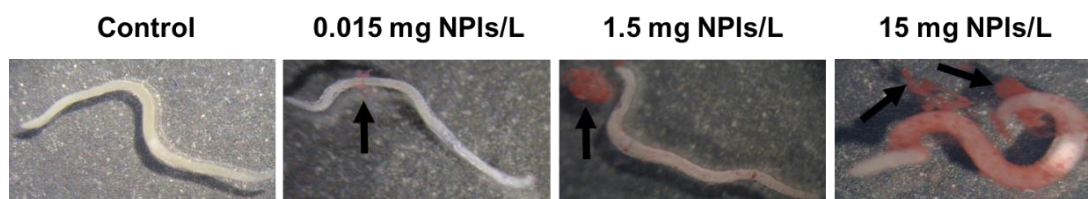

**Figure S1.** Representative images of *Enchytraeus crypticus* adults when exposed during 5 days in ISO water to polystyrene nanoplastics (NPIs). Black arrows indicate NPIs agglomeration/aggregation or adsorption in the clitellum/cocoon area.
